# Supplementary material
Source: PubMed Central journal article supplement (PMC5533557)
Supplement: JSLHR-60-251-s001.pdf [file JSLHR-60-251-s001.pdf]

**Supplemental Material S1.** HHIE items.

- S-1.** Does a hearing problem cause you to use the phone less often than you would like?
- E-2.** Does a hearing problem cause you to feel embarrassed when meeting new people?
- S-3.** Does a hearing problem cause you to avoid groups of people?
- E-4.** Does a hearing problem make you irritable?
- E-5.** Does a hearing problem cause you to feel frustrated when talking to members of your family?
- S-6.** Does a hearing problem cause you difficulty when attending a party?
- E-7.** Does a hearing problem cause you to feel "stupid" or "dumb"?
- S-8.** Do you have difficulty hearing when someone speaks in a whisper?
- E-9.** Do you feel handicapped by a hearing problem?
- S-10.** Does a hearing problem cause you difficulty when visiting friends, relatives, or neighbors?
- S-11.** Does a hearing problem cause you to attend religious services less often than you would like?
- E-12.** Does a hearing problem cause you to be nervous?
- S-13.** Does a hearing problem cause you to visit friends, relatives, or neighbors less often than you would like?
- E-14.** Does a hearing problem cause you to have arguments with family members?
- S-15.** Does a hearing problem cause you difficulty when listening to TV or radio?
- S-16.** Does a hearing problem cause you to go shopping less often than you would like?
- E-17.** Does any problem or difficulty with your hearing upset you at all?
- E-18.** Does a hearing problem cause you to want to be by yourself?
- S-19.** Does a hearing problem cause you to talk to family members less often than you would like?
- E-20.** Do you feel that any difficulty with your hearing limits or hampers your personal or social life?
- S-21.** Does a hearing problem cause you difficulty when in a restaurant with relatives or friends?
- E-22.** Does a hearing problem cause you to feel depressed?
- S-23.** Does a hearing problem cause you to listen to TV or radio less often than you would like?
- E-24.** Does a hearing problem cause you to feel uncomfortable when talking to friends?
- E-25.** Does a hearing problem cause you to feel left out when you are with a group of people?

*Note.* HHIE = Hearing Handicap Inventory for the Elderly.

Items reproduced with permission from Ventry, I. M., & Weinstein, B. E. (1982). The Hearing Handicap Inventory for the Elderly: A new tool. *Ear and Hearing*, 3(3), 128–134. Copyright © 1982 Wolters Kluwer Health, Inc.
